# Supplementary material for: Rapid Affinity Maturation of Novel Anti-PD-L1 Antibodies by a Fast Drop of the Antigen Concentration and FACS Selection of Yeast Libraries
Source: Hindawi journal article supplement (doi:10.1155/2019/6051870), 2019-12-28
Supplement: f1 [file 6051870.f1.pdf]

## Supplementary materials

| yeast culture media and solutions                              | composition                                         | supplier | notes                           |
|----------------------------------------------------------------|-----------------------------------------------------|----------|---------------------------------|
| YPD                                                            | deionized water                                     |          | autoclaving at 121°C for 20'    |
|                                                                | 10g/L yeast extract                                 | sigma    |                                 |
|                                                                | 20g/L peptone                                       | sigma    |                                 |
|                                                                | 20g/L agar (only for semisolid medium)              | sigma    |                                 |
|                                                                | 2% D-glucose                                        |          | freshly added after autoclaving |
|                                                                | 100U/ml penicillin and 100 µg/ml streptomycin       | gibco    |                                 |
| selective medium YNB                                           | deionized water                                     |          | autoclaving at 121°C for 20'    |
|                                                                | 6.8 g/L yeast nitrogen base                         | sigma    |                                 |
|                                                                | 20g/L agar (only for semisolid medium)              | sigma    |                                 |
|                                                                | 2% D-glucose                                        |          | freshly added after autoclaving |
|                                                                | 1X yeast synthetic drop out without tryptophan      |          |                                 |
|                                                                | 100U/ml penicillin and 100 µg/ml streptomycin       | gibco    |                                 |
| induction medium                                               | deionized water                                     |          | autoclaving at 121°C for 20'    |
|                                                                | 6.8 g/L yeast nitrogen base                         | sigma    |                                 |
|                                                                | 0.05% D-glucose                                     |          |                                 |
|                                                                | 2% D-galactose                                      |          | freshly added after autoclaving |
|                                                                | 1X yeast synthetic drop out without tryptophan      |          |                                 |
|                                                                | 100U/ml penicillin and 100 µg/ml streptomycin       | gibco    |                                 |
| 20% D-glucose stock solution                                   | deionized water                                     |          | 0.22 µm filtration              |
|                                                                | 200g/L D-glucose                                    | sigma    |                                 |
| 20% D-galactose stock solution                                 | deionized water                                     |          | 0.22 µm filtration              |
|                                                                | 200g/L D-galactose                                  | sigma    |                                 |
| 10X yeast synthetic drop out without tryptophan stock solution | deionized water                                     |          | 0.22 µm filtration              |
|                                                                | 19.2g/L yeast synthetic drop out without tryptophan | sigma    |                                 |

Figure S1: List and recipes of media and solutions used for yeast cultures.

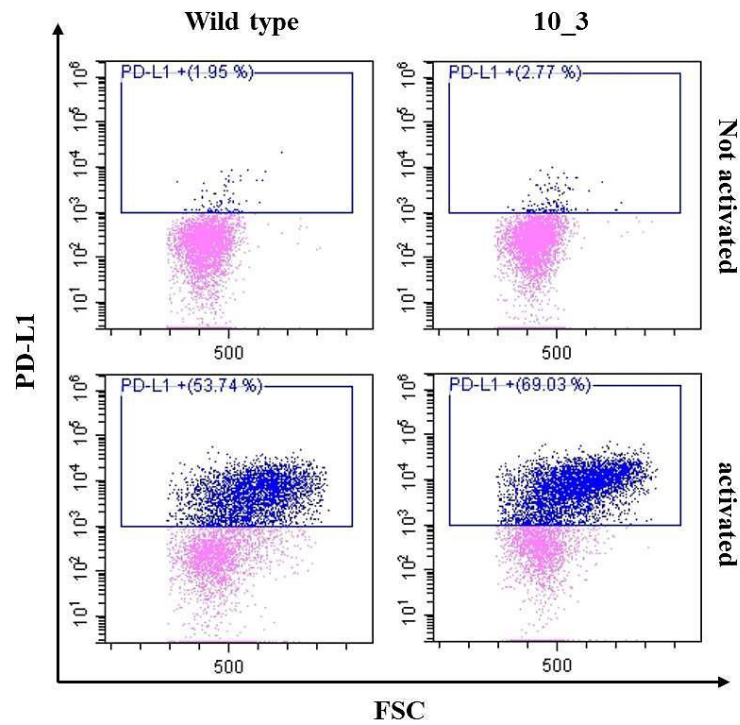

Figure S2: Validation of binding specificity of mAb 10\_3 to activated hPBMCs. The panels show the percentages of not activated (upper panels) and activated (lower panels) lymphocytes (CD2-positive cells) which bound to a saturating concentration of the wild type and affinity matured mAb 10\_3 (blue cells). The affinity maturation did not change the specificity for PD-L1, as demonstrated by the ability of binding only to activated cells.
